# Supplementary material for: The Fanconi anemia DNA damage repair pathway in the spotlight for germline predisposition to colorectal cancer
Source: PubMed Central journal article supplement — Eur J Hum Genet. 2016 May 11;24(10):1501–5. doi: 10.1038/ejhg.2016.44 (PMC5027689; doi:10.1038/ejhg.2016.44), 2016-05-11
Supplement: ejhg201644x1.pdf [file ejhg201644x1.pdf]

**Supplementary Table 1.** Key terms used to prioritize genetic variants with functional annotations and/or bibliography related to cancer. Functional annotations listed corresponded to those selected from Gene Ontology, KEGG and REACTOME, whereas the Bibliography category referred to terms from NCBI gene summary and Gene Reference Into Function (GeneRIF). Noteworthy, other annotations containing listed key terms were also selected (e.g. “breast cancer” since it contains “cancer”).

| <b>Gene ontology biological process terms</b>                                                                                                                                                                                                                                                                                                                                          |                                                                                                                                                                                                                                                                                                                                                                                                                                                                                                                                                    |
|----------------------------------------------------------------------------------------------------------------------------------------------------------------------------------------------------------------------------------------------------------------------------------------------------------------------------------------------------------------------------------------|----------------------------------------------------------------------------------------------------------------------------------------------------------------------------------------------------------------------------------------------------------------------------------------------------------------------------------------------------------------------------------------------------------------------------------------------------------------------------------------------------------------------------------------------------|
| Apoptosis and cell death                                                                                                                                                                                                                                                                                                                                                               | Abortive mitotic cell cycle                                                                                                                                                                                                                                                                                                                                                                                                                                                                                                                        |
| <u>Apoptotic process</u><br>Execution phase of apoptosis<br>Apoptotic signaling pathway<br>Mitochondrial outer membrane permeabilization<br>Release of cytochrome c from mitochondria<br>Apoptosome assembly<br><u>Cell death</u><br>Programmed cell death<br>Autophagic cell death<br>Macroautophagy<br>Microautophagy<br>Regulation of autophagy<br>Cytolysis<br>Necrotic cell death | Mitotic spindle organization<br>Mitotic nuclear envelope disassembly<br>Mitotic nuclear envelope reassembly<br>Establishment of mitotic spindle localization<br>Mitosis<br>Mitotic prophase<br>Mitotic metaphase<br>Mitotic anaphase<br>Mitotic telophase<br>Mitotic prometaphase<br>Mitotic sister chromatid segregation<br>Spindle assembly involved in mitosis<br>Mitotic spindle assembly checkpoint<br>Mitotic centrosome separation<br>Cell cycle arrest<br>Cell cycle checkpoint<br>DNA integrity checkpoint<br>Spindle assembly checkpoint |
| Cell adhesion                                                                                                                                                                                                                                                                                                                                                                          | Cell differentiation                                                                                                                                                                                                                                                                                                                                                                                                                                                                                                                               |
| Cell-cell adhesion<br>Homophilic cell adhesion<br>Cell-cell junction assembly<br>Cell-substrate junction assembly<br>Regulation of cell junction assembly<br>Adherens junction assembly<br>Cell adhesion mediated by integrin<br>Cell-substrate adhesion<br>Regulation of cell adhesion<br>Tight junction assembly                                                                     | Cell differentiation<br>Epithelial cell differentiation<br>G1 to G0 transition involved in cell differentiation<br>Mesodermal cell differentiation<br>Stem cell differentiation<br>Cell development<br>Cell fate commitment<br>Negative regulation of cell differentiation<br>Positive regulation of cell differentiation<br>Regulation of epithelial cell differentiation                                                                                                                                                                         |
| Cell cycle                                                                                                                                                                                                                                                                                                                                                                             | Cell growth                                                                                                                                                                                                                                                                                                                                                                                                                                                                                                                                        |
| Cell cycle<br>Cell cycle phase<br>Cell cycle phase transition<br>Mitotic cell cycle                                                                                                                                                                                                                                                                                                    | Cell growth                                                                                                                                                                                                                                                                                                                                                                                                                                                                                                                                        |

|                                                                   |
|-------------------------------------------------------------------|
| Developmental cell growth                                         |
| Regulation of cell proliferation                                  |
| Regulation of epithelial cell proliferation                       |
| Cellular response to DNA damage stimulus                          |
| DNA repair                                                        |
| Single strand break repair                                        |
| Mismatch repair                                                   |
| Postreplication repair                                            |
| Double-strand break repair                                        |
| DNA replication proofreading                                      |
| Non-recombinational repair                                        |
| Base-excision repair                                              |
| Nucleotide-excision repair                                        |
| UV-damage excision repair                                         |
| Interstrand cross-link repair                                     |
| DNA damage checkpoint                                             |
| DNA damage response, detection of DNA damage                      |
| DNA damage induced protein phosphorylation                        |
| Replication fork processing                                       |
| Telomere maintenance in response to DNA damage                    |
| Intrinsic apoptotic signaling pathway in response to DNA damage   |
| Signal transduction in response to DNA damage                     |
| Chromatin                                                         |
| Chromatin organization                                            |
| Helicase activity                                                 |
| Maintenance of DNA methylation                                    |
| Chromosome organization                                           |
| Kinetochore organization                                          |
| Chromosome condensation                                           |
| Chromosome decondensation                                         |
| Chromosome breakage                                               |
| Telomere organization                                             |
| Maintenance of DNA repeat elements                                |
| Sister chromatid cohesion                                         |
| Regulation of cohesin localization to chromatin                   |
| Centromere complex assembly                                       |
| Regulation of chromosome organization                             |
| Maintenance of chromatin silencing                                |
| Telomere maintenance                                              |
| Maintenance of fidelity involved in DNA-dependent DNA replication |
| DNA protection                                                    |
| Chromatin remodeling                                              |
| Pathways                                                          |
| Wnt receptor signaling pathway                                    |
| BMP signaling pathway                                             |
| SMAD protein signal transduction                                  |

|                                                               |
|---------------------------------------------------------------|
| SMAD protein complex assembly                                 |
| Negative regulation of MAPKKK cascade                         |
| Negative regulation of MAP kinase activity                    |
| Regulation of JUN kinase activity                             |
| Negative regulation of JNK cascade                            |
| Insulin receptor signaling pathway                            |
| Cellular response to TGF-beta stimulus                        |
| Cellular response to TGF-beta stimulus                        |
| Transforming growth factor beta receptor signaling pathway    |
| Response to transforming growth factor beta stimulus          |
| Epidermal growth factor receptor signaling pathway            |
| Notch signaling pathway                                       |
| Positive regulation of transcription of Notch receptor target |
| Notch receptor processing, ligand-dependent                   |
| Negative regulation of protein kinase B signaling cascade     |
| Anterior/posterior pattern formation                          |
| Netrin-activated signaling pathway                            |
| Regulation of TOR signaling cascade                           |
| Target of rapamycin signaling pathway                         |
| Regulation of phosphatidylinositol 3-kinase cascade           |
| NF-kappaB import into nucleus                                 |
| Regulation of NIK/NF-kappaB cascade                           |
| Regulation of p52-dependent NF-kappaB signaling               |
| <b>KEGG pathway terms</b>                                     |
| Base excision repair                                          |
| Nucleotide excision repair                                    |
| Mismatch repair                                               |
| Homologous recombination                                      |
| Non-homologous end-joining                                    |
| Cell cycle checkpoint                                         |
| Metabolism of xenobiotics by cytochrome P450                  |
| Benzoate degradation                                          |
| Aminobenzoate degradation                                     |
| Fluorobenzoate degradation                                    |
| Chloroalkane and chloroalkene degradation                     |
| Chlorocyclohexane and chlorobenzene degradation               |
| Toluene degradation                                           |
| Xylene degradation                                            |
| Nitrotoluene degradation                                      |
| Ethylbenzene degradation                                      |
| Styrene degradation                                           |
| Atrazine degradation                                          |
| Caprolactam degradation                                       |
| DDT degradation                                               |
| Bisphenol degradation                                         |
| Dioxin degradation                                            |

Naphthalene degradation  
 Polycyclic aromatic hydrocarbon degradation  
 Furfural degradation  
 Steroid degradation  
 Metabolism of xenobiotics by cytochrome P450  
 Focal adhesion  
 Adherens junction  
 Tight junction  
 Gap junction  
 Purine metabolism  
 Pyrimidine metabolism  
 Wnt signaling pathway  
 Notch signaling pathway  
 TGF-beta signaling pathway  
 Insulin signaling pathway  
 PI3K-Akt signaling pathway  
 Mucin type O-Glycan biosynthesis

Integrin cell surface interactions  
 Adherens junctions interactions  
 Cell-Cell communication  
 Telomere maintenance  
 Extension of Telomeres  
 Chromosome maintenance  
 Signaling by BMP  
 Signaling by TGF beta  
 Signaling by Wnt  
 Beta-catenin phosphorylation cascade  
 Degradation of beta-catenin by the destruction complex  
 PKB-mediated events  
 TGF-beta receptor signaling  
 Constitutive PI3K/AKT Signaling in Cancer  
 Chromosome maintenance  
 O-linked glycosylation of mucins

**Reactome terms**

DNA repair  
 Base excision repair  
 Cleavage of the damaged purine  
 Depurination  
 Removal of DNA patch containing abasic residue  
 Resolution of AP sites via the single-nucleotide replacement pathway  
 Resolution of Abasic Sites (AP sites), organism-specific biosystem  
 Gap-filling DNA repair synthesis and ligation in GG-NER  
 Gap-filling DNA repair synthesis and ligation in TC-NER  
 Transcription-coupled NER (TC-NER)  
 Repair synthesis for gap-filling by DNA polymerase in TC-NER  
 Apoptosis  
 Apoptotic execution phase  
 Apoptotic cleavage of cellular proteins  
 Mitotic anaphase  
 M phase  
 G1/S transition  
 DNA replication  
 G2/M transition

**Bibliography terms**

Cancer  
 Colon cancer  
 Rectal cancer  
 Tumor  
 Gastrointestinal tumor  
 Tumor suppressor  
 Oncogene  
 Carcinoma  
 Sarcoma  
 Adenoma  
 Polyposis  
 Polyps  
 Cowden  
 Inflammatory bowel disease  
 Crohn  
 Osteosarcoma  
 Glioma  
 Melanoma  
 Leukemia  
 Lymphoma
