# Supplementary material for: The Fanconi anemia DNA damage repair pathway in the spotlight for germline predisposition to colorectal cancer
Source: PubMed Central journal article supplement — Eur J Hum Genet. 2016 May 11;24(10):1501–5. doi: 10.1038/ejhg.2016.44 (PMC5027689; doi:10.1038/ejhg.2016.44), 2016-05-11
Supplement: ejhg201644x2.pdf [file ejhg201644x2.pdf]

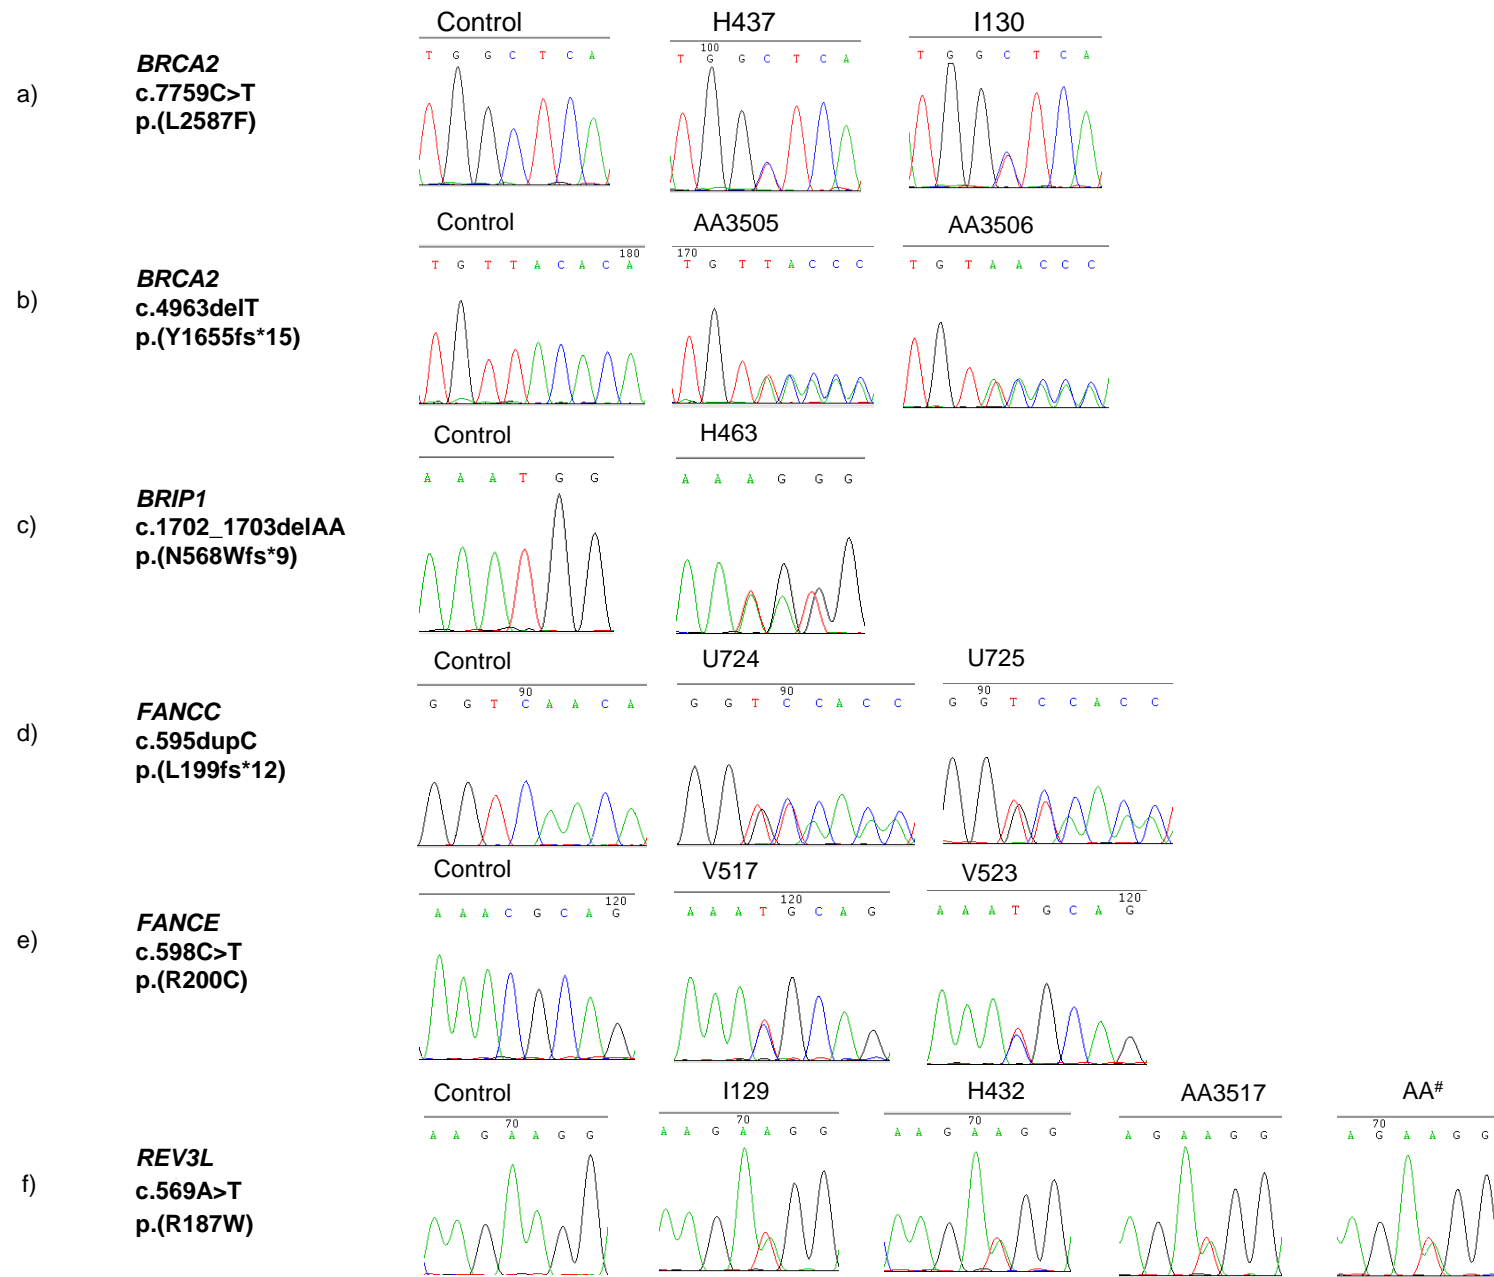

**Supplementary Figure 1.** Sanger sequencing chromatograms of the 6 genetic variants belonging to the Fanconi anemia DNA damage repair detected in our sequenced patients and indicated with their codes. a) H437 and I130 from FAM6. b) AA3505 and AA3506 from FAM20. c) H463 patient. d) U724 and U725 from FAMN4. For this variant the reverse sequence is shown. e) V517 and V523 from FAM40. f) I129, H432, AA3517 from FAM3. #AA:family member from FAM3 pedigree with advanced adenomas was tested for segregation. Sequences were compared to a healthy control.
